# Supplementary material for: Asymmetric supercapacitors based on nano-architectured nickel oxide/graphene foam and hierarchical porous nitrogen-doped carbon nanotubes with ultrahigh-rate performance
Source: Royal Society of Chemistry journal article supplement (doi:10.1039/c3ta15046a), 2013-12-18
Supplement: c3ta15046a.pdf [file c3ta15046a.pdf]

## Electronic Supplementary Information

# **Asymmetric supercapacitors based on nano-architected NiO/graphene foam and hierarchical porous nitrogen-doped carbon nanotubes with ultrahigh-rate performance**

*Huanwen Wang, Huan Yi, Xiao Chen, Xuefeng Wang\**

Department of Chemistry

Key Laboratory of Yangtze River Water Environment of Ministry of Education

Tongji University, Shanghai 200092 (P. R. China)

\*Email: [xfwang@tongji.edu.cn](mailto:xfwang@tongji.edu.cn)

## Calculations of specific capacitance, energy density and power density based on the galvanostatic charge–discharge curves:

(1) In three electrode configuration, specific capacitances derived from galvanostatic tests can be calculated from the equation:

$$C = I\Delta t / m\Delta V \quad (1)$$

where  $I$  is the discharging current,  $t$  is the discharge time,  $\Delta V$  is the potential drop during discharge, and  $m$  is the mass of active material in the working electrode.

(2) In two electrode **symmetric** cell configuration, specific capacitances derived from galvanostatic tests can be calculated from the equation:

$$C = 2(I\Delta t / m\Delta V) \quad (2)$$

where  $I$  is the constant discharge current,  $\Delta t$  is the discharging time,  $m$  is the mass of **one electrode**, and  $\Delta V$  is the voltage drop upon discharging.

Energy density ( $E$ ) and power density ( $P$ ) derived from galvanostatic tests can be calculated from the following equations:

$$E = [C (\Delta V)^2] / 8 \quad (3)$$

$$P = E / \Delta t \quad (4)$$

where  $E$ ,  $C$ ,  $\Delta V$ ,  $P$  and  $\Delta t$  are the specific energy, specific capacitance, potential window, specific power and discharge time, respectively.

(3) In two electrode **asymmetric** cell configuration, specific capacitances derived from galvanostatic tests can be calculated from the equation:

$$C = I\Delta t / m\Delta V \quad (5)$$

where  $I$  is the discharging current,  $t$  is the discharge time,  $\Delta V$  is the potential drop during discharge, and  $m$  is the **total mass** of the active electrode materials in the positive and negative electrode.

Energy density ( $E$ ) and power density ( $P$ ) derived from galvanostatic tests can be calculated from the following equations:

$$E = [C (\Delta V)^2]/2 \quad (6)$$

$$P = E/\Delta t \quad (7)$$

where  $E$ ,  $C$ ,  $\Delta V$ ,  $P$  and  $\Delta t$  are the specific energy, specific capacitance, potential window, specific power and discharge time, respectively.

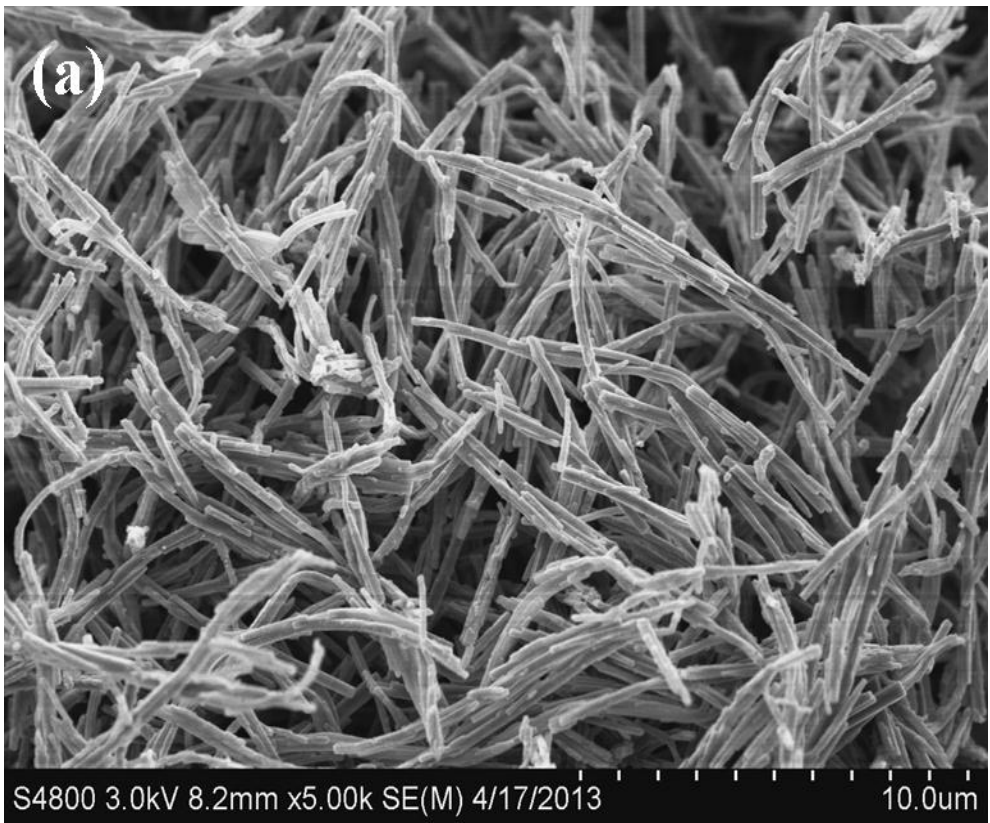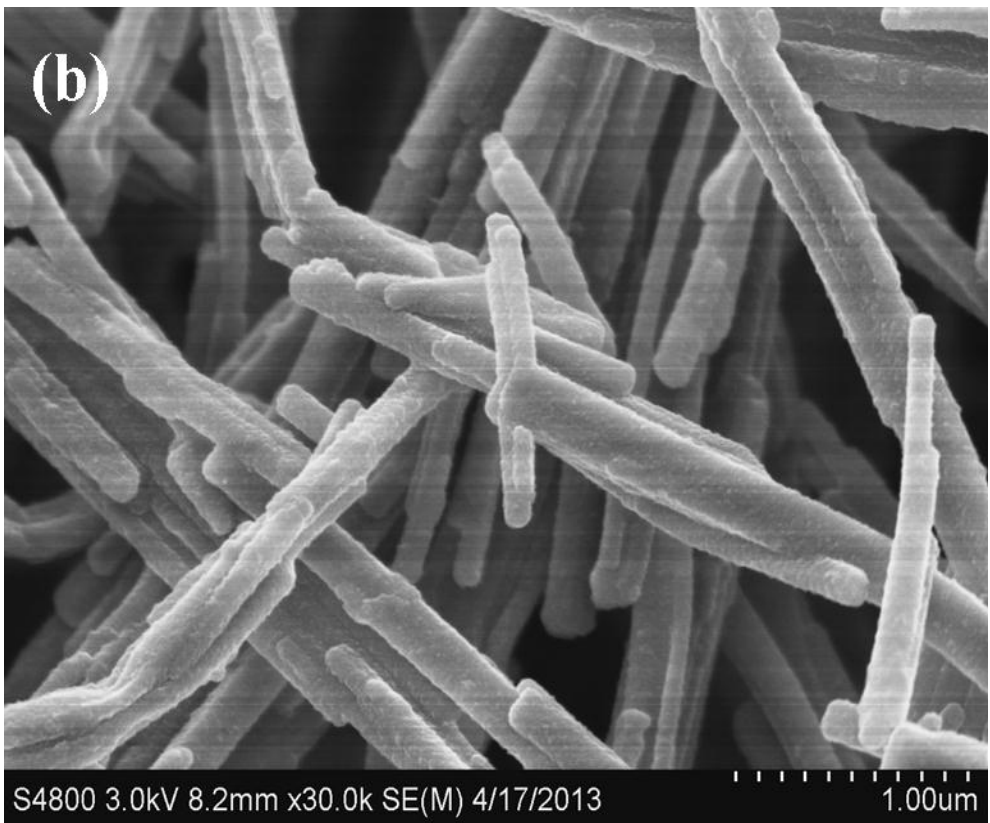

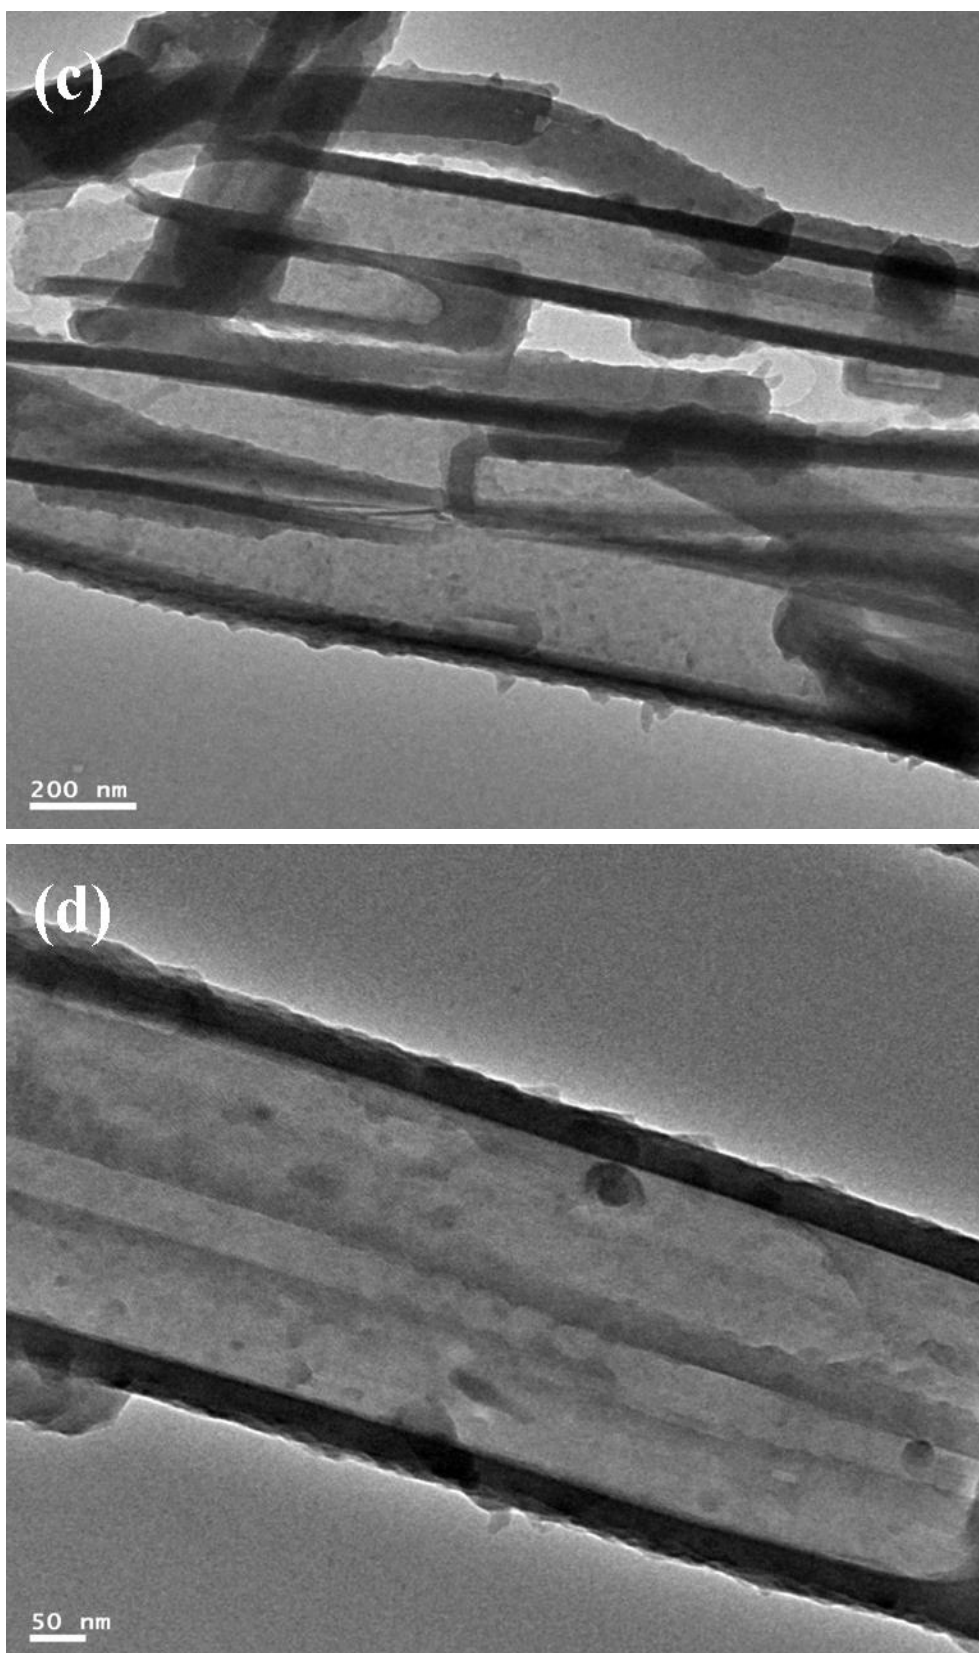

**Fig. S1** (a, b) FESEM and (c, d)TEM images of PPy nanotubes.

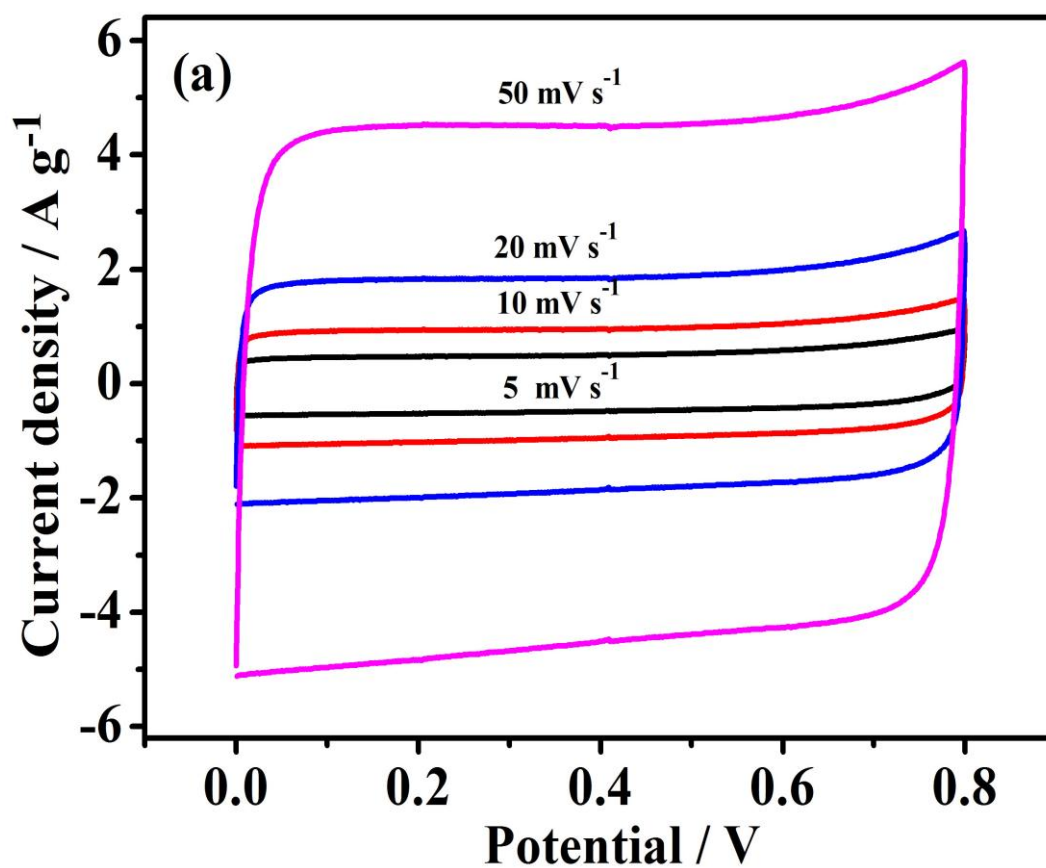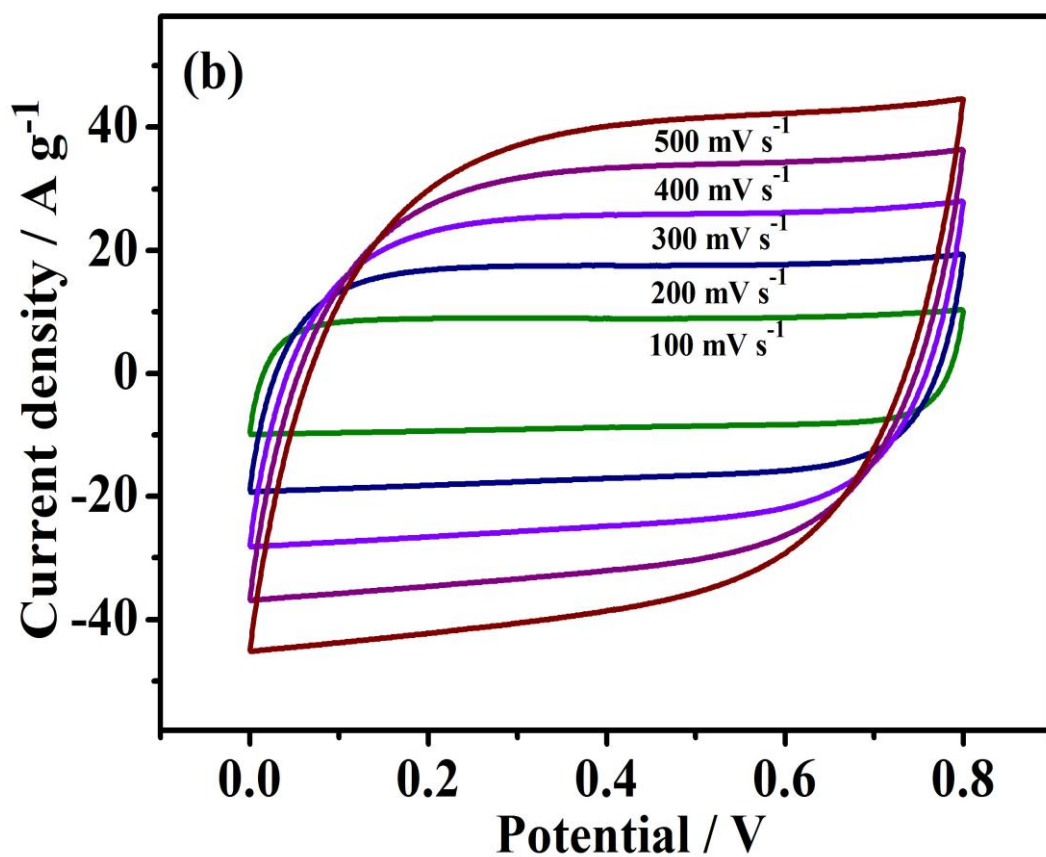

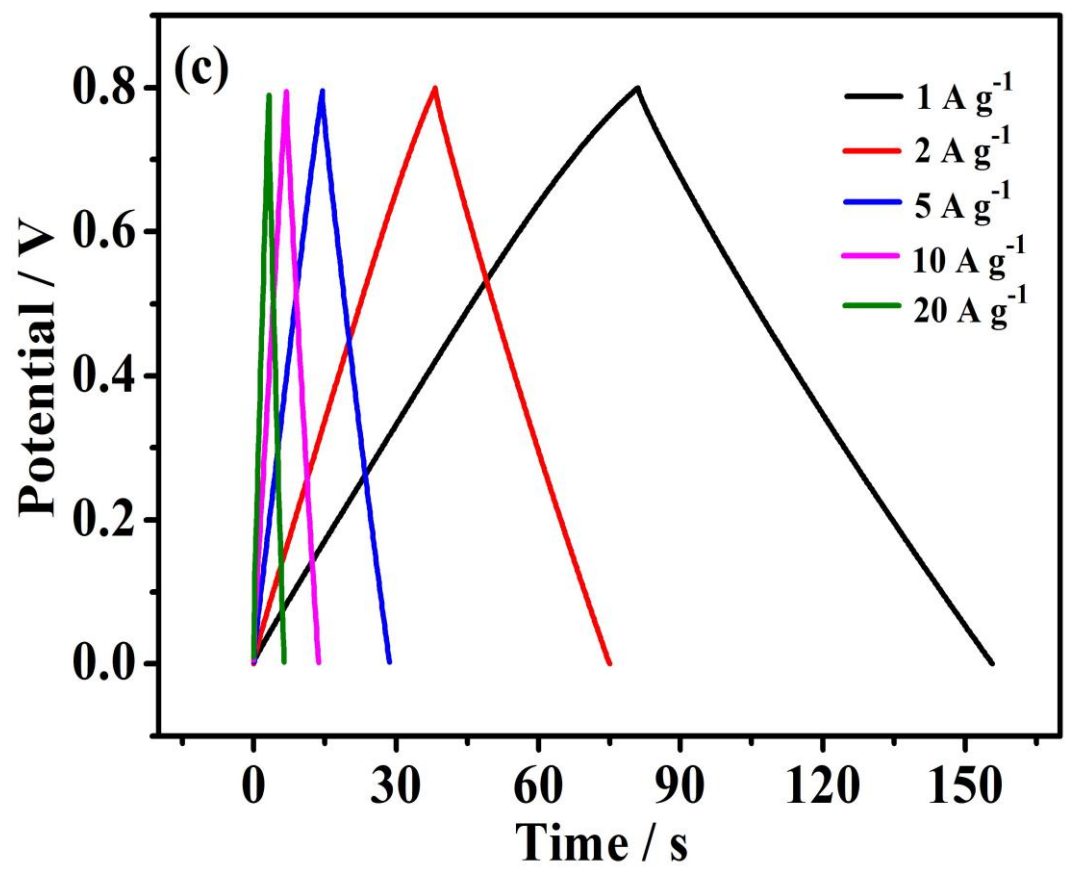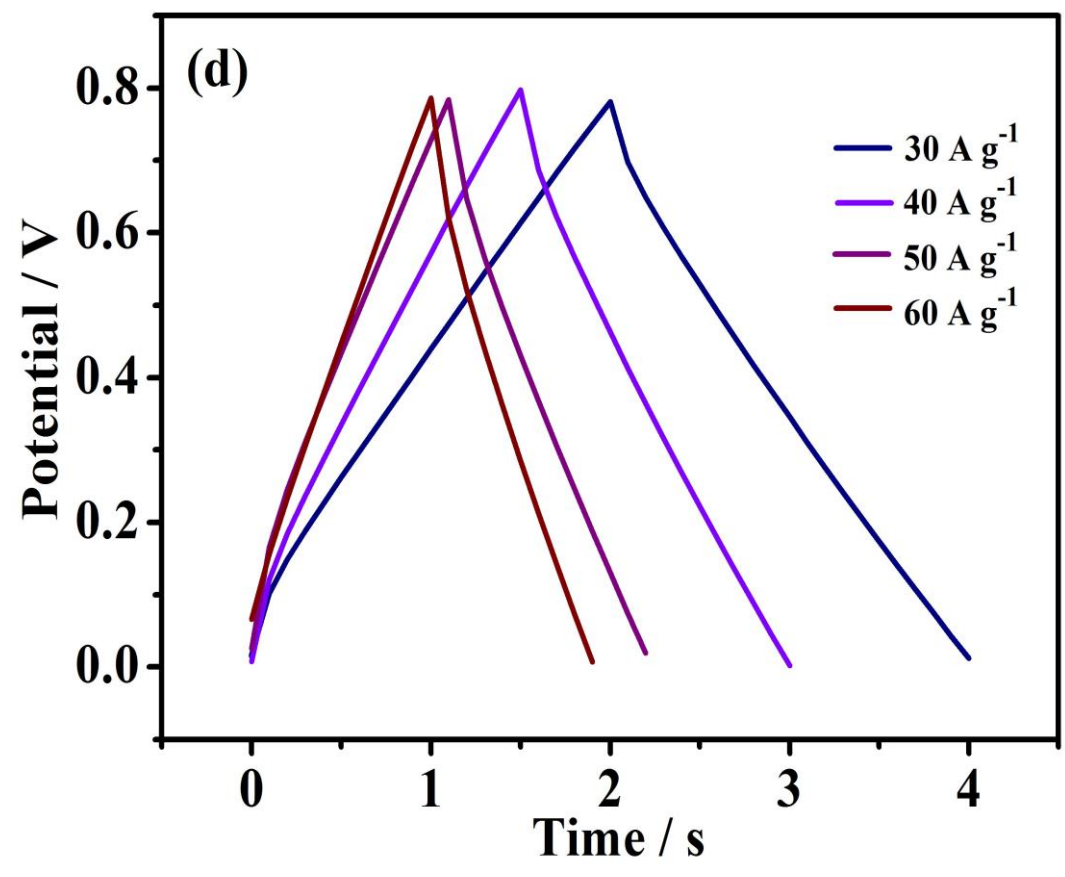

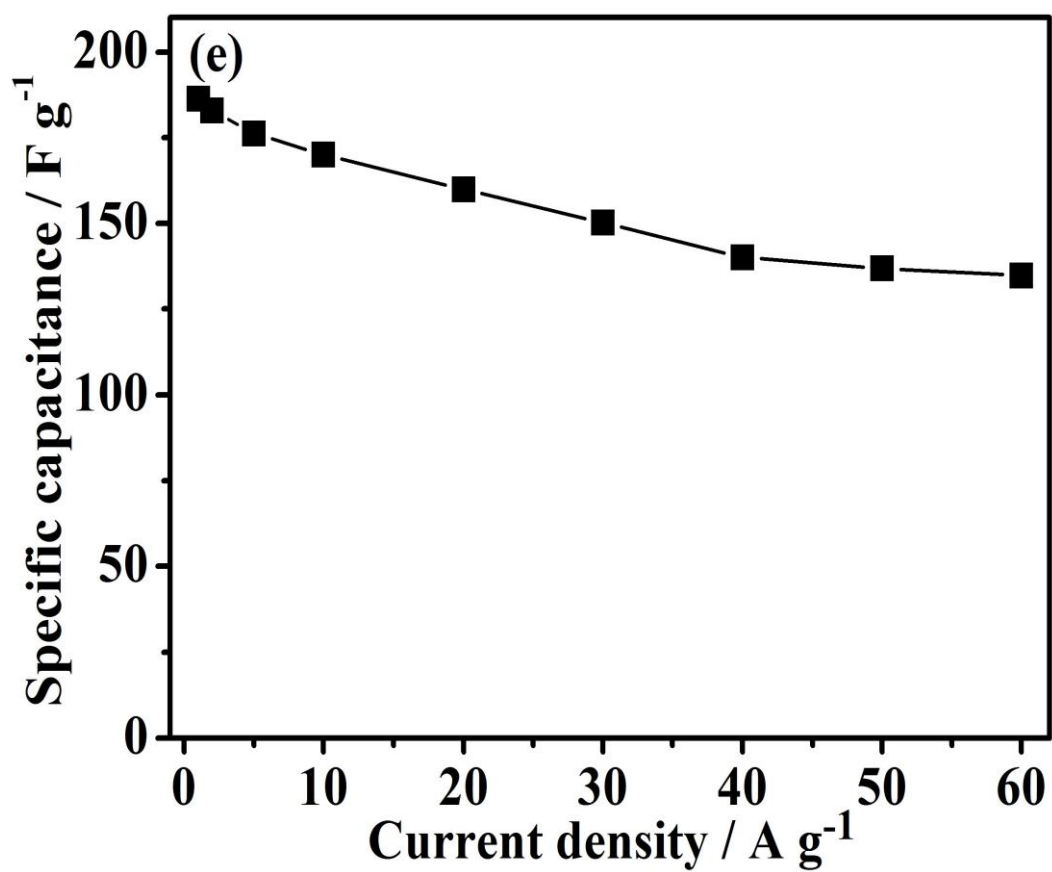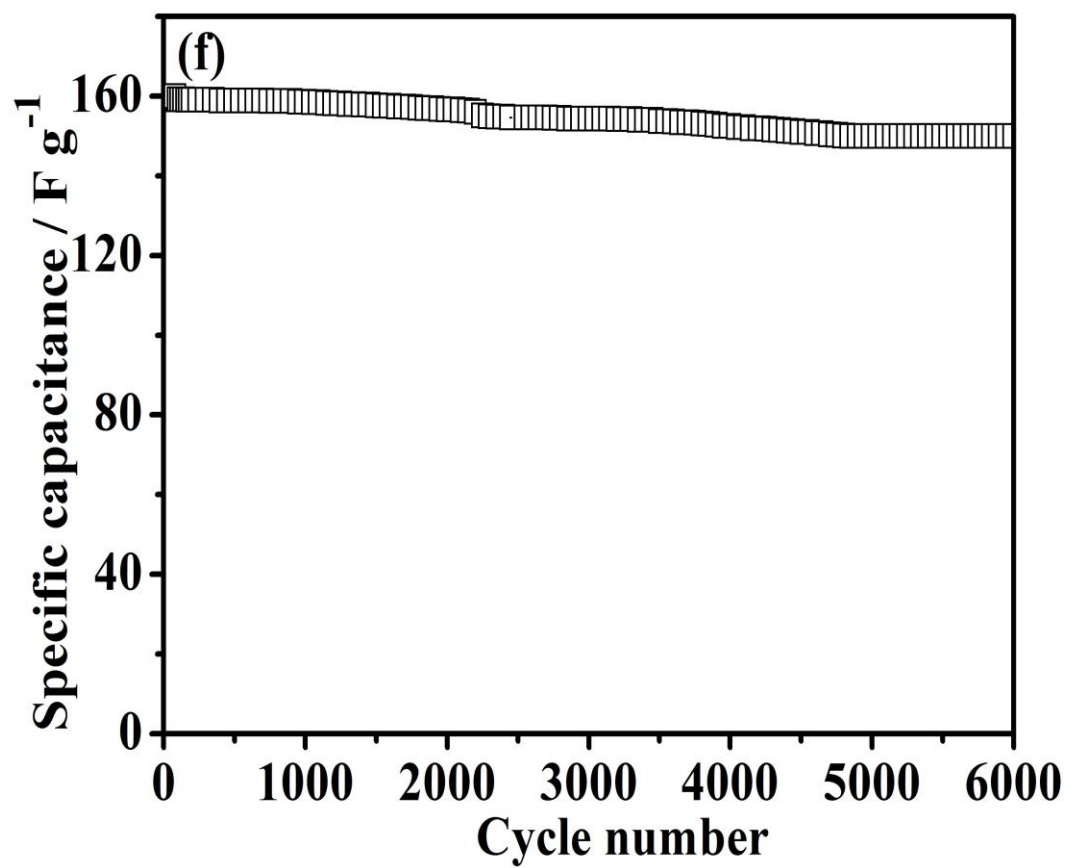

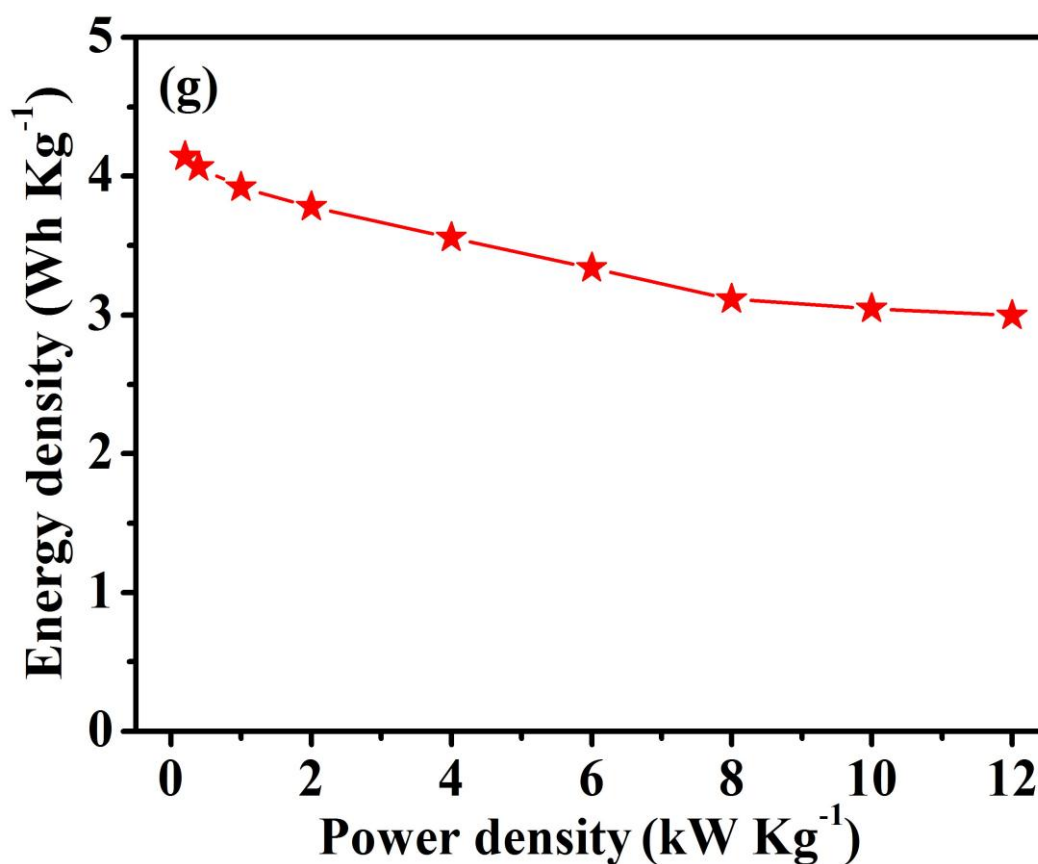

**Fig. S2** Electrochemical characterization of the HPNCNTs//HPNCNTs symmetric supercapacitor. (a, b) CV curves of the HPNCNTs//HPNCNTs symmetric supercapacitor at various scan rates in 1M KOH. (c, d) Charge–discharge curves of the HPNCNTs//HPNCNTs symmetric supercapacitor at various current densities (ranging from 1 to 60 A g<sup>-1</sup>). (e) Specific capacitance of the HPNCNTs//HPNCNTs symmetric supercapacitor as a function of current density. (f) Cycle performance of the HPNCNTs//HPNCNTs symmetric supercapacitor measured at 20 A g<sup>-1</sup> for 6000 cycles. (g) Energy and power density of the HPNCNTs//HPNCNTs symmetric supercapacitor.

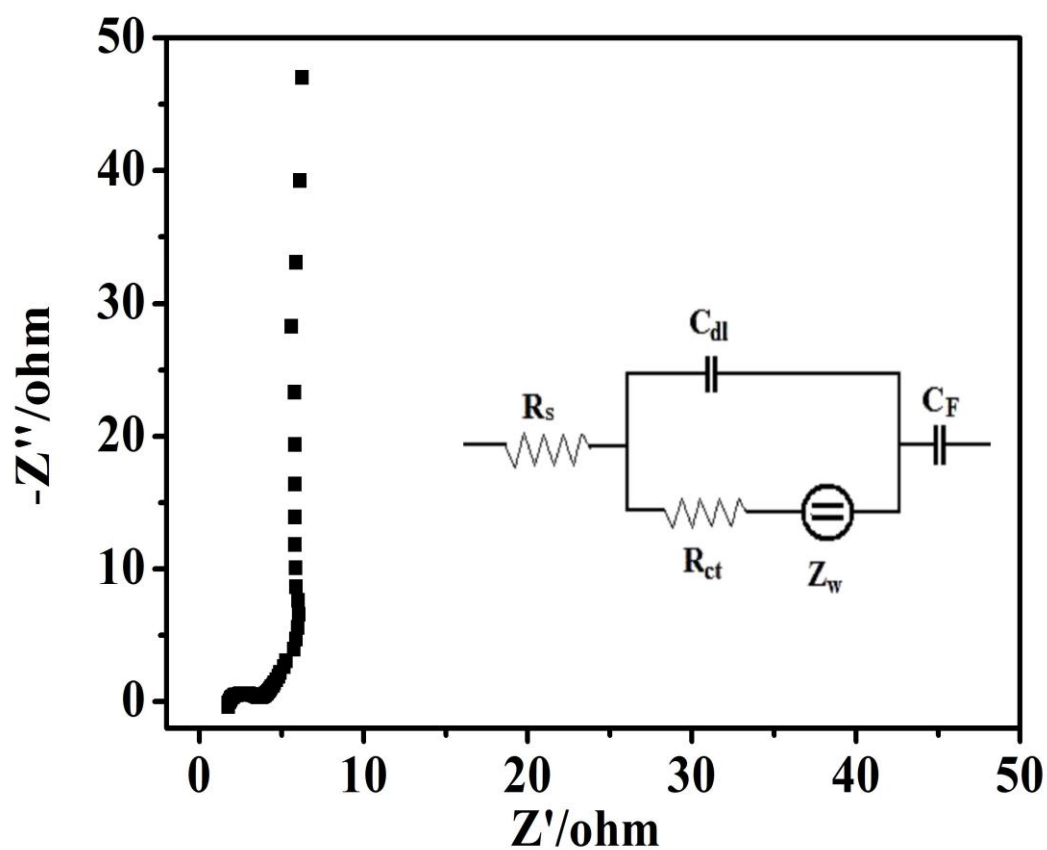

**Fig. S3** Nyquist plot of the NiO/GF//HPNCNTs asymmetric supercapacitor with the equivalent circuit in the inset.
